# Supplementary material for: Remarkably boosted high-temperature energy storage of a polymer dielectric induced by polymethylsesquioxane microspheres
Source: Royal Society of Chemistry journal article supplement (doi:10.1039/d4mh01305k), 2024-10-29
Supplement: d4mh01305k1.pdf [file d4mh01305k1.pdf]

Supporting Information

**Remarkably boosted High-temperature Energy Storage of Polymer Dielectrics induced by Polymethyksesquioxane Microspheres**

*Zelong Chang<sup>a</sup>, Li Lei<sup>a</sup>, Linwei Zhu<sup>a</sup>, Yang Quan<sup>a</sup>, Zengliang Ren<sup>a</sup>, Yihui Qian<sup>a</sup>, Davoud Dastan<sup>b</sup>, Zhicheng Shi<sup>a,\*</sup>*

*<sup>a</sup>School of Materials Science and Engineering, Ocean University of China, Qingdao 266100, China.*

*<sup>b</sup>Department of Materials Science and Engineering Cornell University, Ithaca, NY, 14850, USA.*

*\* Corresponding author: Zhicheng Shi*

*\* E-mail: zcshi@ouc.edu.cn*

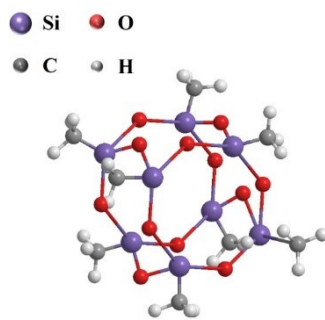

**Figure S1.** The Chemical structure of the polymethyksesquioxane (PMSQ)

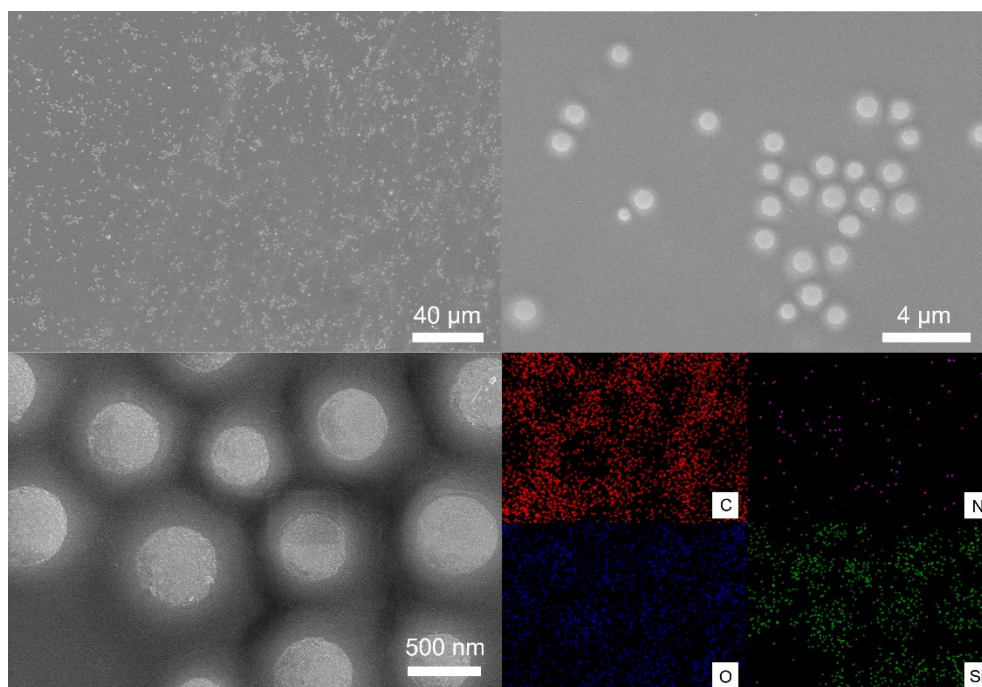

**Figure S2.** The SEM and EDS mappings of the surface of 10 wt.% PMSQ/PEI film

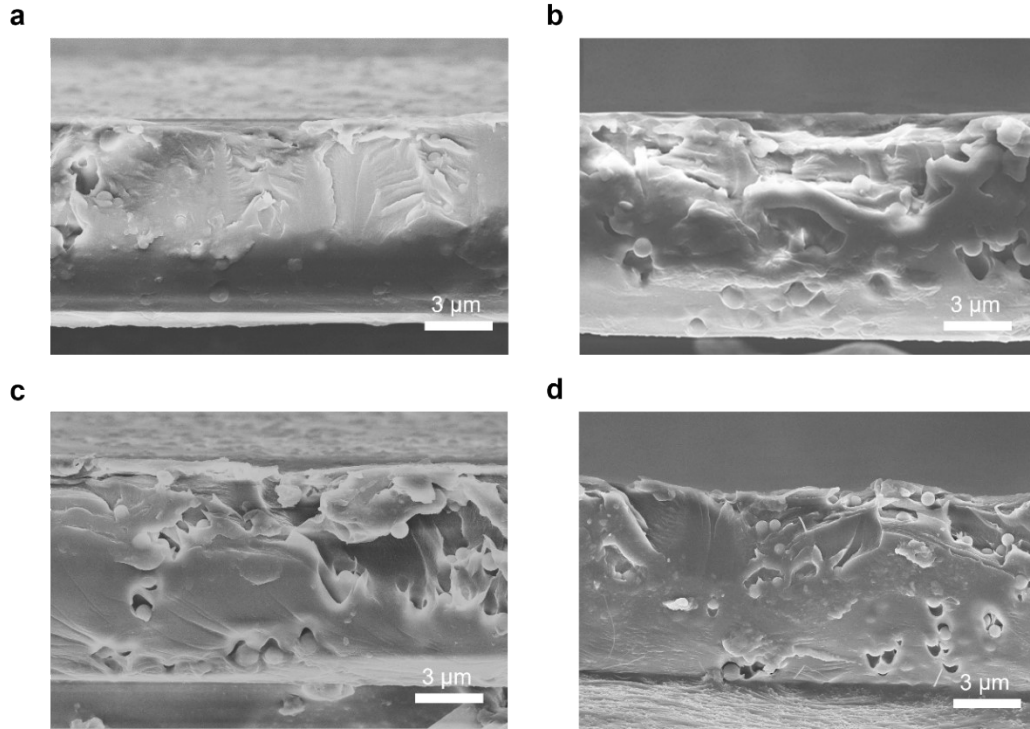

**Figure S3.** Cross-sectional SEM images of a) 2.5 wt.% PMSQ/PEI; b) 5 wt.% PMSQ/PEI; c) 7.5 wt.% PMSQ/PEI; d) 10 wt.% PMSQ/PEI composite films.

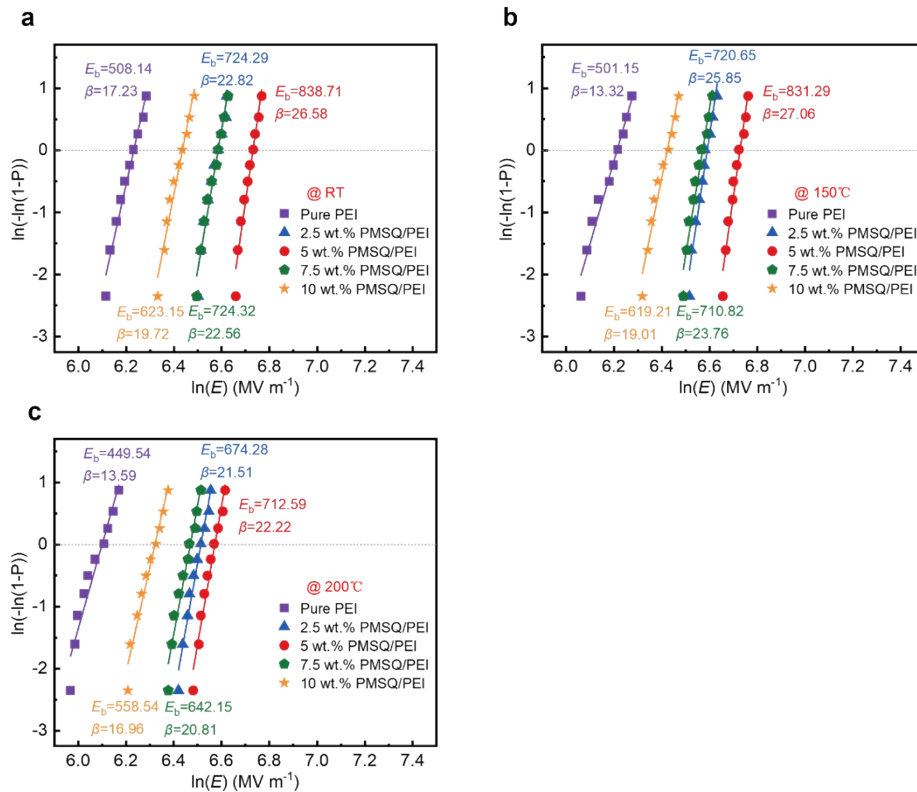

**Figure S4.** Two-parameter Weibull distribution analysis of the characteristic breakdown strength of pure PEI films and PMSQ/PEI composite films measured at a) room temperature; b) 150 °C and c) 200 °C.

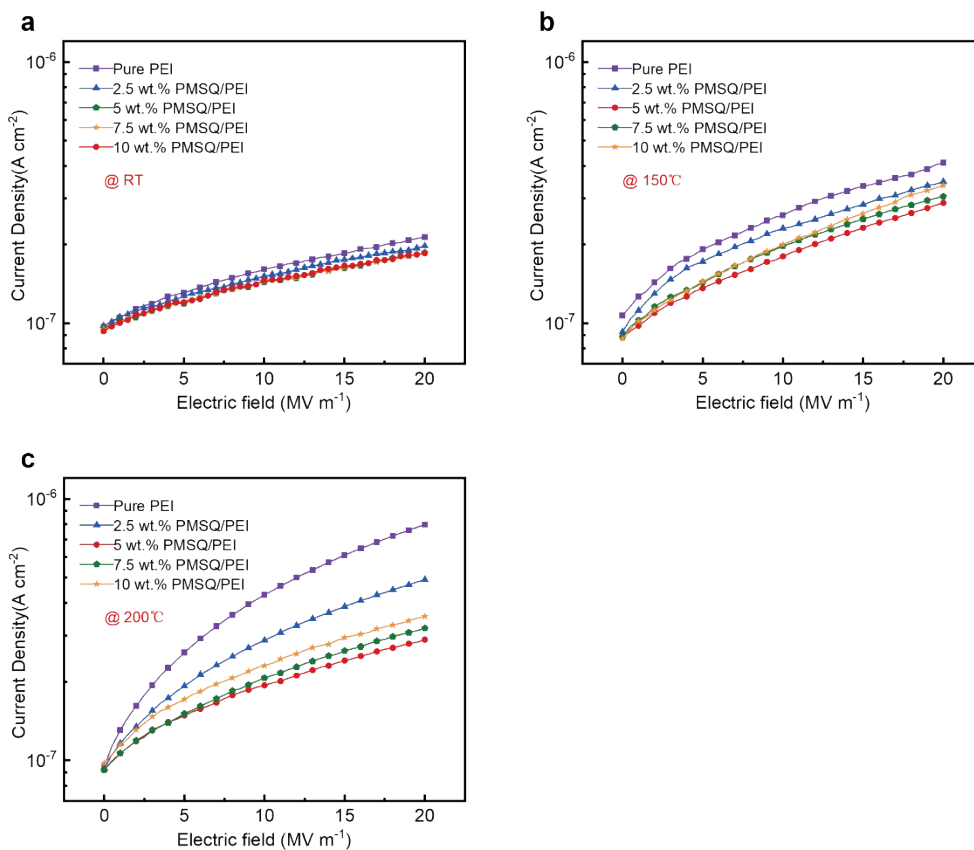

**Figure S5.** The leakage current of the pure PEI films and PMSQ/PEI composite films measured at a) room temperature; b) 150 °C and c) 200 °C.

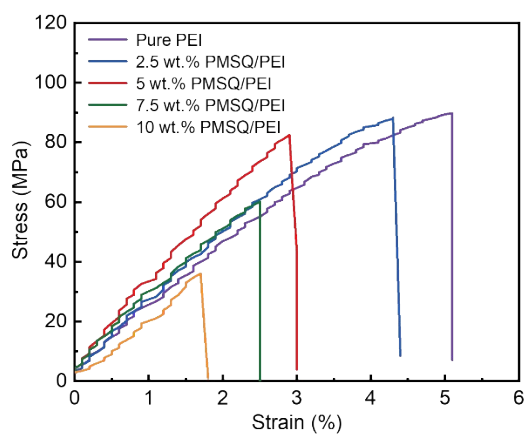

**Figure S6.** Representative stress-strain curves of the pure PEI films and PMSQ/PEI composite films.

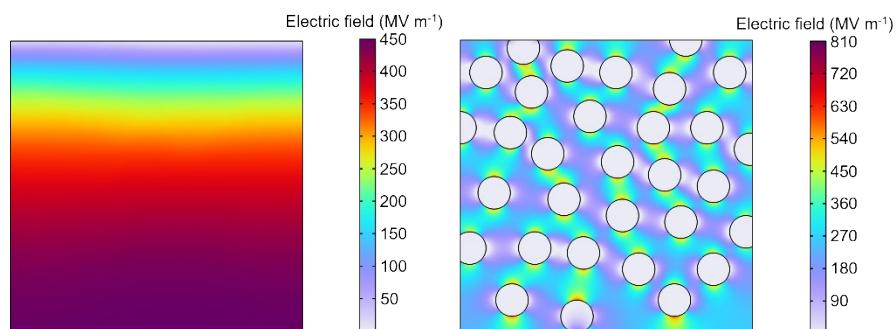

**Figure S7.** COMSOL simulation of electric field inside the pure PEI and PMSQ/PEI composite films.

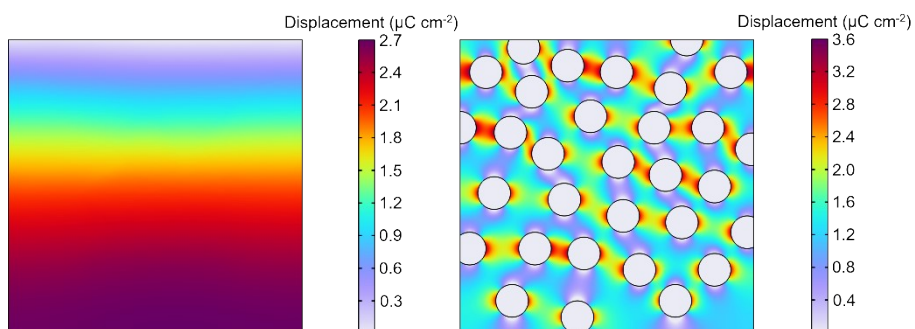

**Figure S8.** COMSOL simulation of polarization distributions inside the pure PEI and PMSQ/PEI composite films.

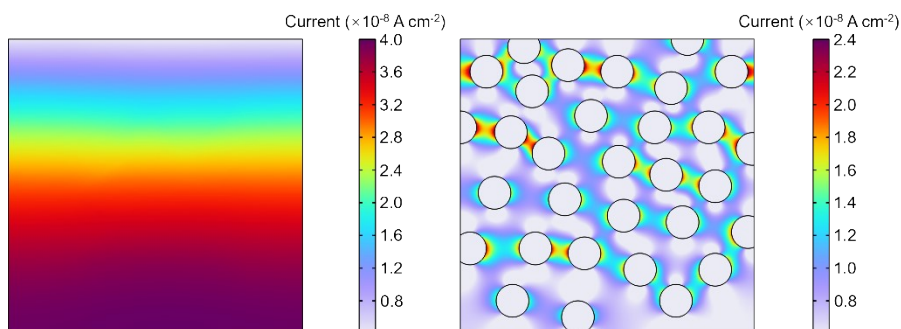

**Figure S9.** COMSOL simulation of leakage current of the pure PEI and PMSQ/PEI composite films.

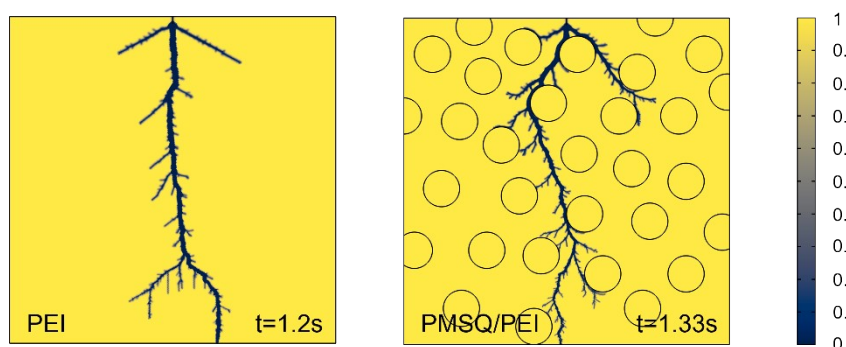

**Figure S10.** The whole simulated electrical tree propagation path of PEI and composite film.

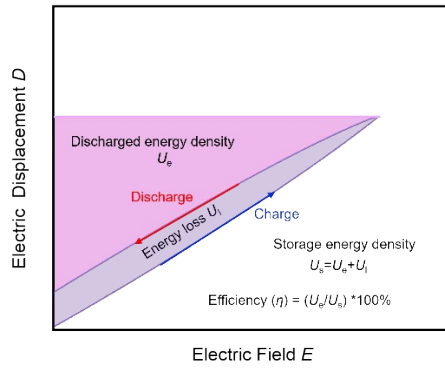

**Figure S11.** Schematic unipolar  $D$ - $E$  loop of a dielectric material.

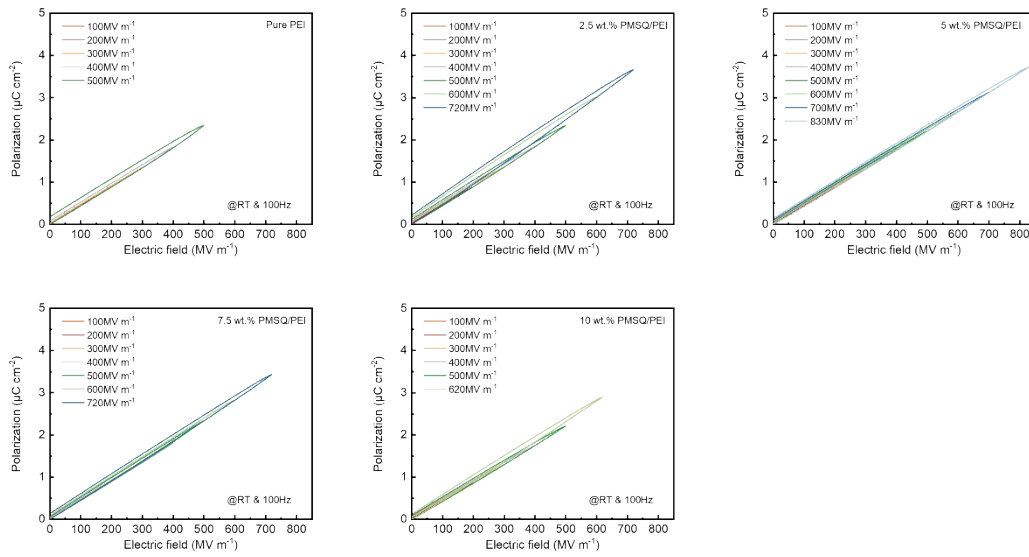

**Figure S12.**  $D$ - $E$  loops of pure PEI film and PMSQ/PEI composite films at room temperature and 100 Hz.

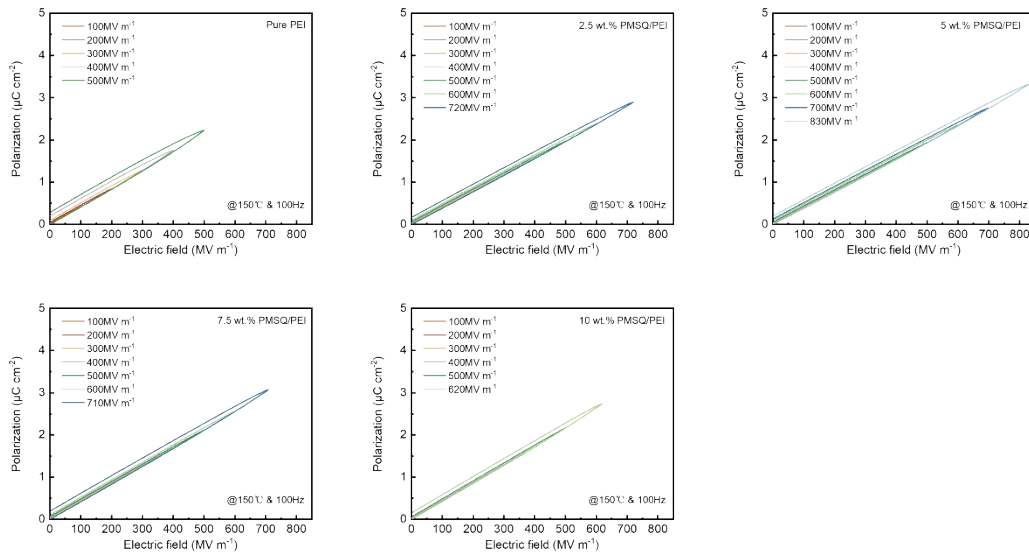

**Figure S13.** *D-E* loops of pure PEI film and PMSQ/PEI composite films at 150 °C and 100Hz.

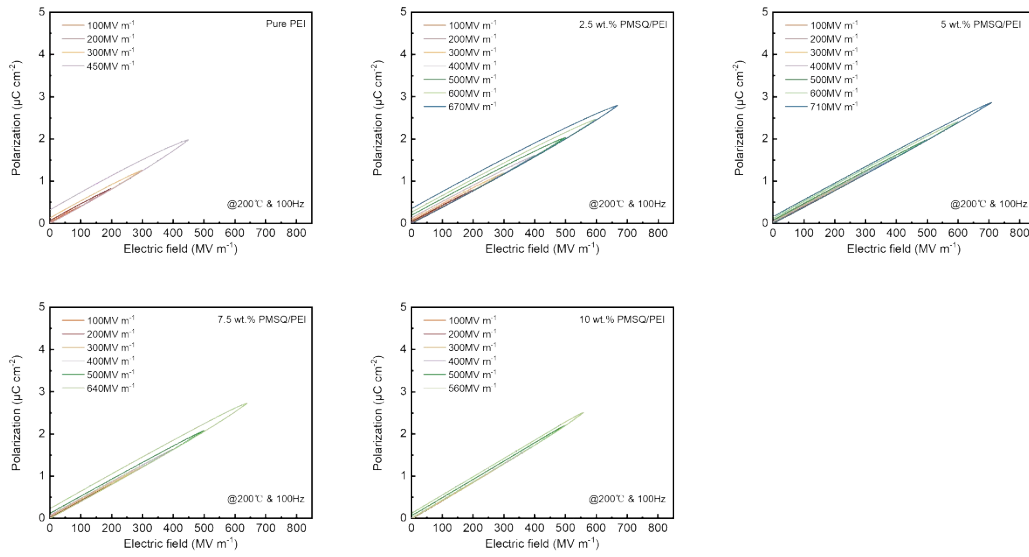

**Figure S14.** *D-E* loops of pure PEI film and PMSQ/PEI composite films at 200 °C and 100Hz.



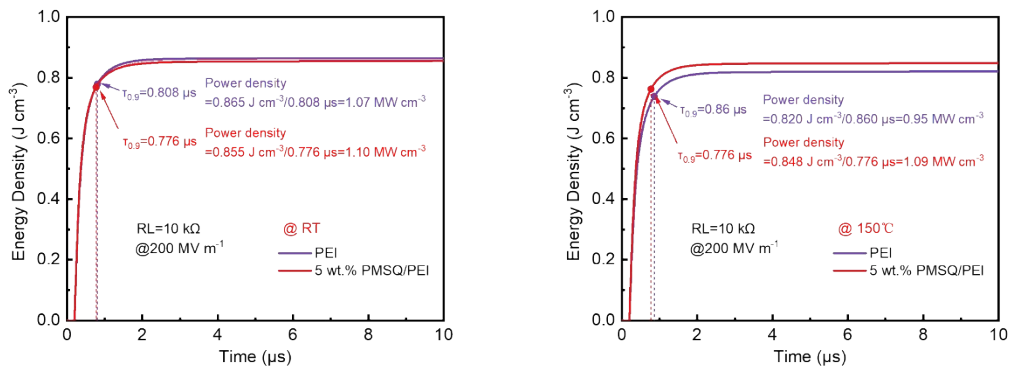

**Figure S15.** Fast discharge testing of pure PEI film and 5 wt.% PMSQ/PEI composite film at  $200 \text{ MV m}^{-1}$  and different temperatures.

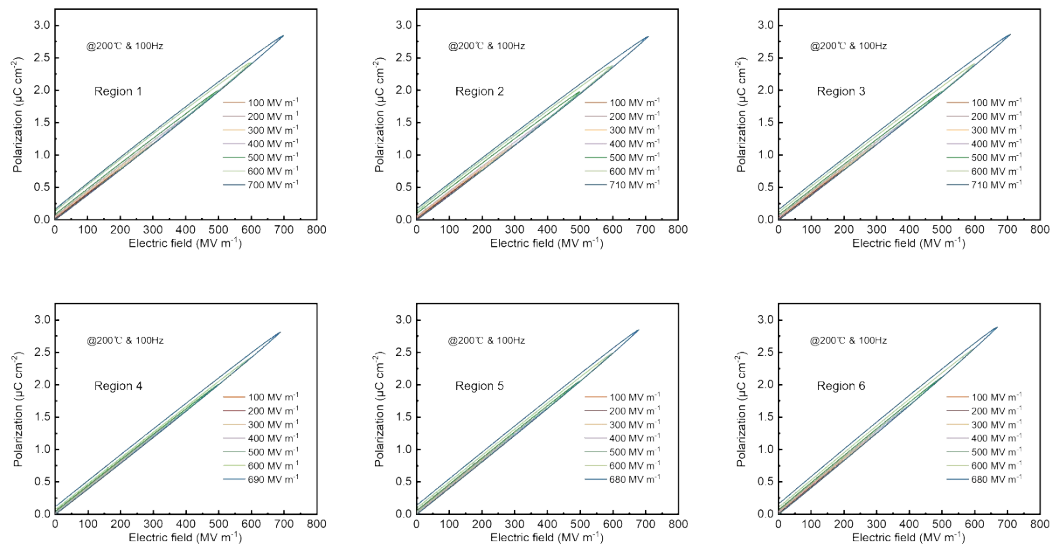

**Figure S16.** *D-E* loops of different region under variation electric field at  $200 \text{ }^\circ\text{C}$  and  $100\text{Hz}$ .

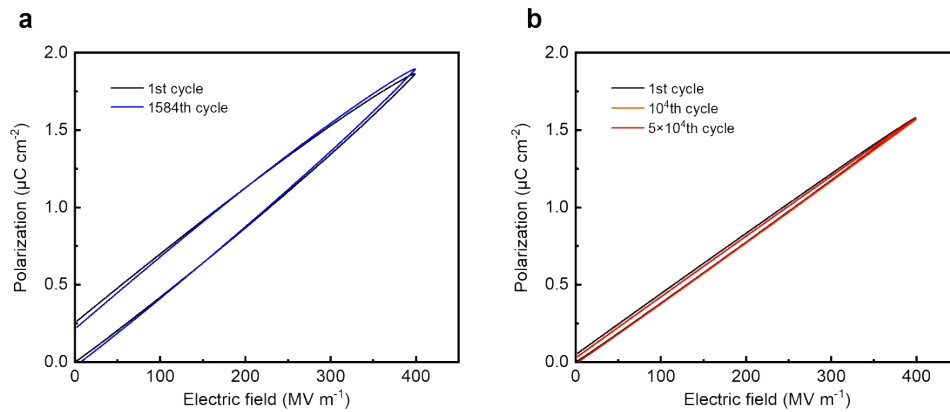

**Figure S17.** *D-E* loops (under  $400\text{MV m}^{-1}$  and  $200^\circ\text{C}$ ) of the (a) pure PEI and (b) 5 wt.% PMSQ/PEI films measured at different cycles



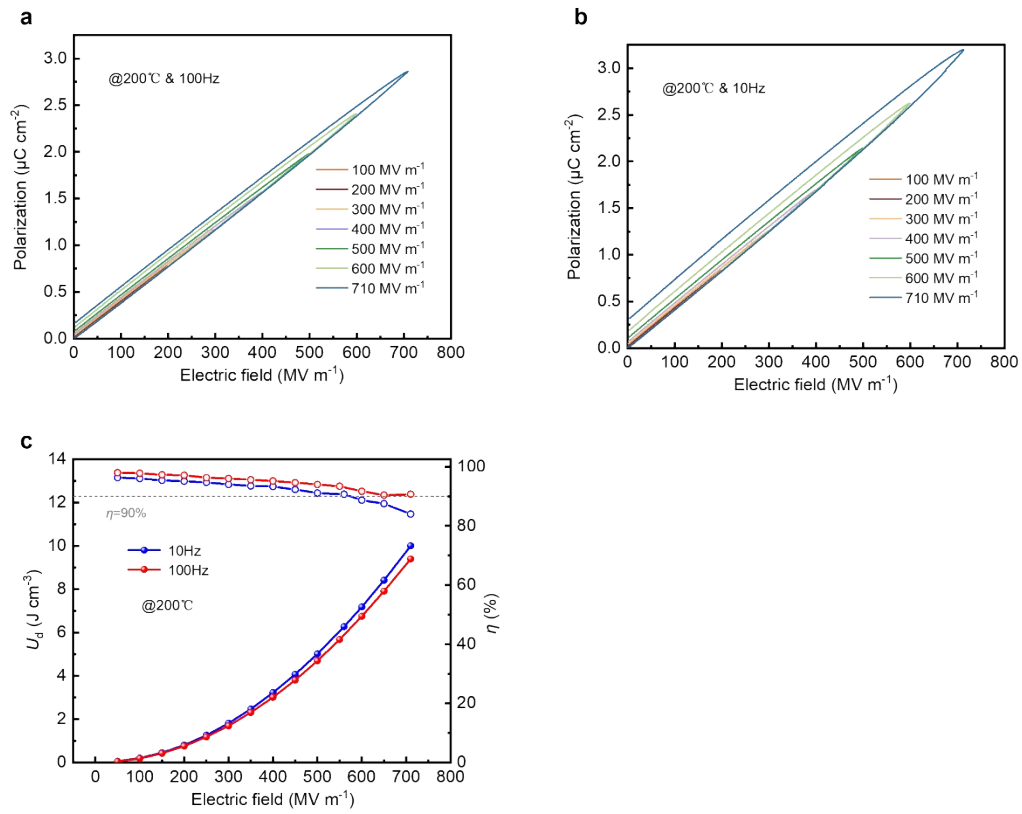

**Figure S18.** The *D-E* loops of 5 wt.% PMSQ/PEI composite film at 200°C and a) 100Hz b) 10Hz; c) The discharged energy densities and efficiency of 5 wt.% PMSQ/PEI composite film at 200°C and different frequency.
